# Supplementary material
Source: ML conference proceedings conference paper supplement (https://aclanthology.org/2021.emnlp-main.113)

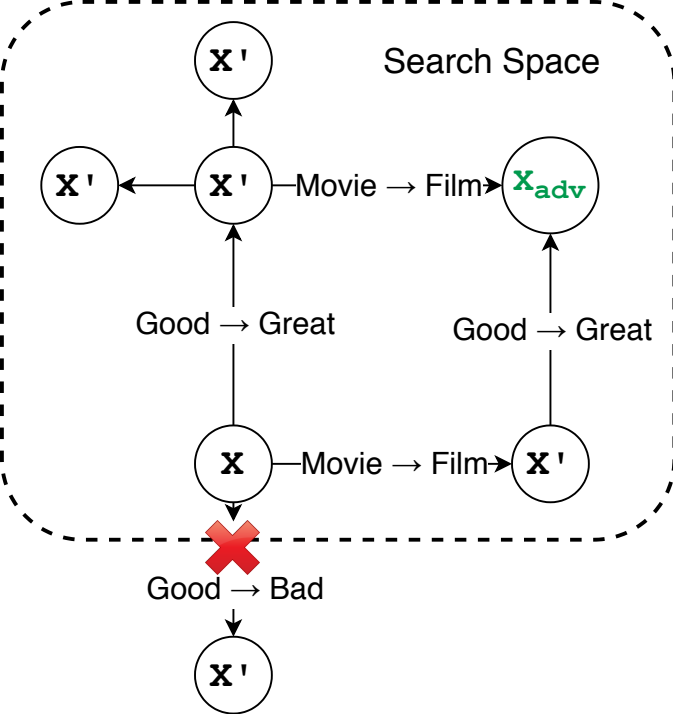

**Original:** Movie was good → **Positive**

**Adversarial:** Film was great → **Negative**

Supplement: Software [file 2021.emnlp-main.113.Software.zip]
